# Supplementary material for: Ti2O3 film electrode for water treatment via electrochemical chlorine evolution
Source: Royal Society of Chemistry journal article supplement (doi:10.1039/d3ma00908d), 2024-01-01
Supplement: d3ma00908d1.pdf [file d3ma00908d1.pdf]

## Supplementary Information

### Ti<sub>2</sub>O<sub>3</sub> film electrode for water treatment via electrochemical chlorine evolution

Yishu Zhang<sup>a</sup>, Caroline Kirk<sup>\*a</sup>, Neil Robertson<sup>\*a</sup>

<sup>a</sup>School of Chemistry, University of Edinburgh, David Brewster Road, Joseph Black Building,  
Edinburgh, EH9 3FJ, UK

Figure S1. FT-IR spectrum of 400EC30

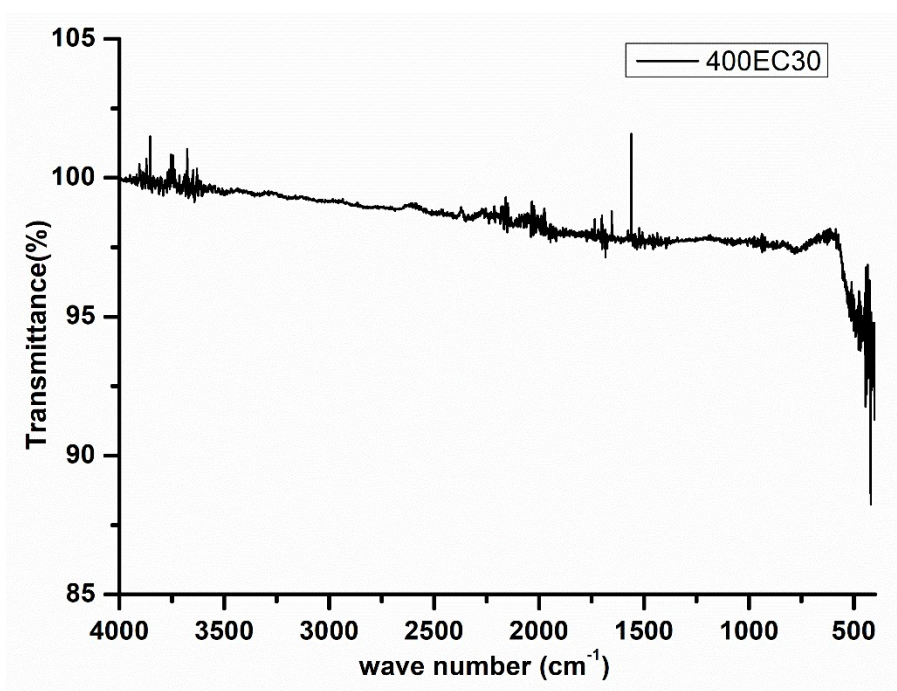

Figure S2. SEM images of (a) 450EC60 (b) 500EC30 (c) 500EC60

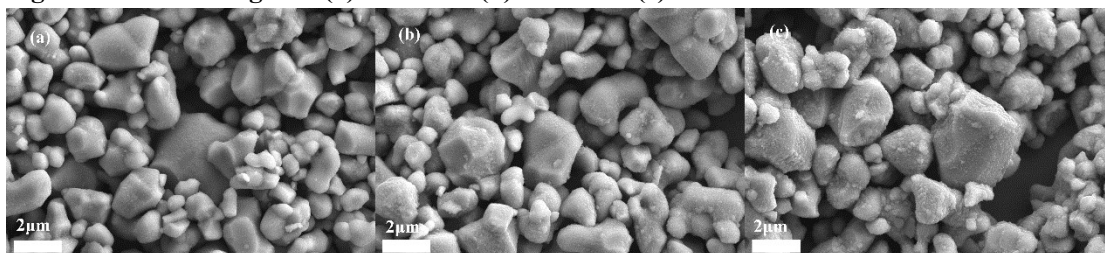

Figure S3. linear fit of DPD reagent UV absorption and NaClO concentration

Linear fit:  $y=2553.74x$

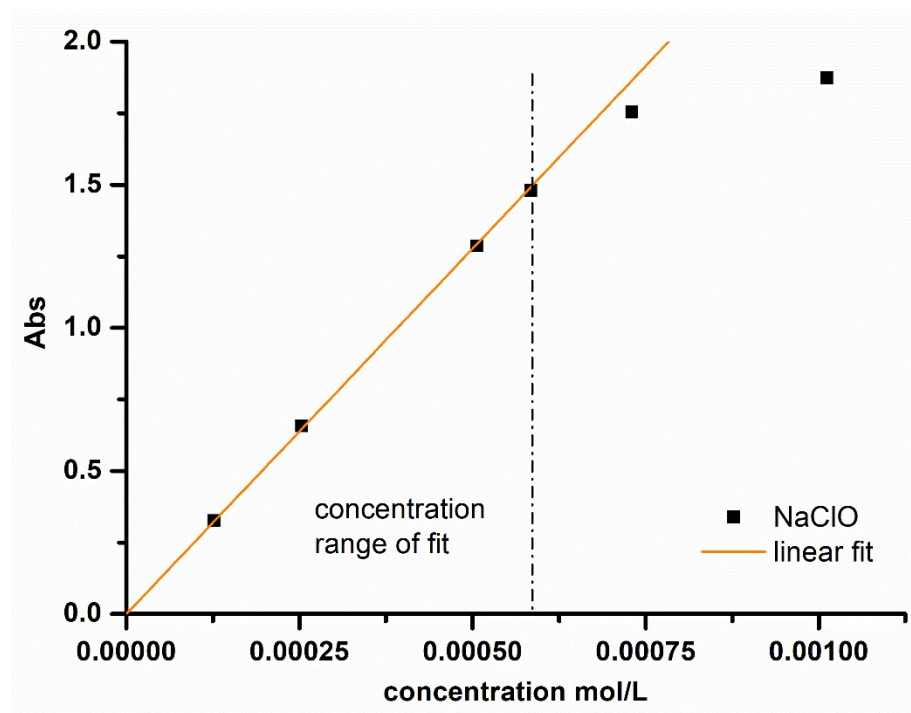

Figure S4. Current during free chlorine capture test of 400EC30

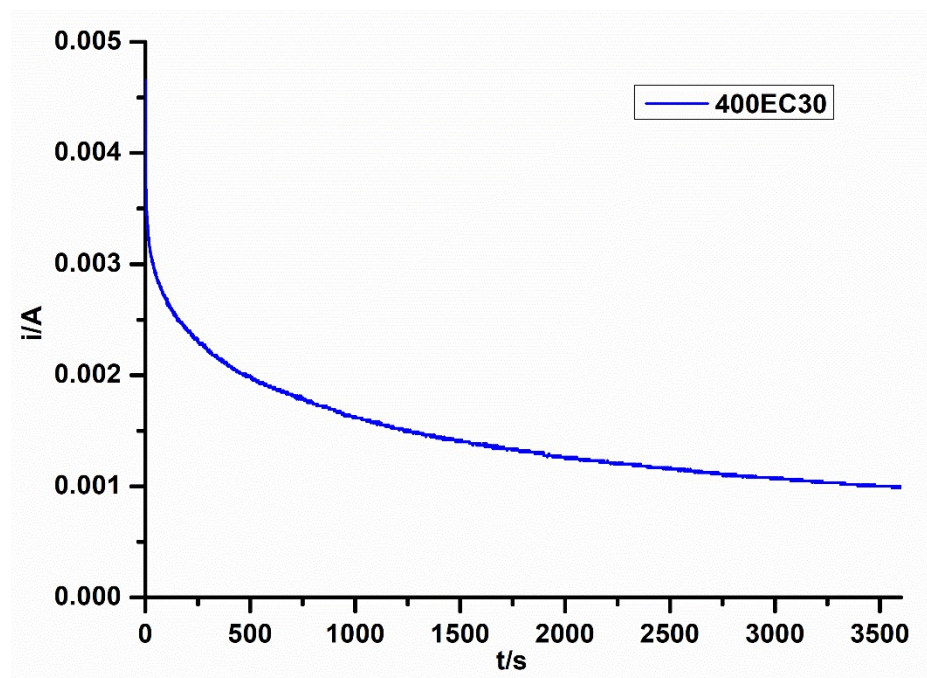

**Example calculation of Faradaic yield:**

The current during free chlorine capture test of 400EC30 was shown in Figure S4.

Calculate the area under curve ( $0 \leq x \leq 3600$  s) by integration calculation. The value is the total charge which have gone through the electrode. For 400EC30, 5.29 C of charge have gone through it in 1 h.

The free chlorine concentration ( $5.56 \times 10^{-4}$  mol/L) was calculated from the UV-vis spectra data.

The amount of substance of free chlorine (calculated as  $\text{ClO}^-$ ):

$$n_{\text{ClO}^-} = c_{\text{ClO}^-} \times V_{\text{cell}} = 5.56 \times 10^{-4} \text{ mol} \cdot \text{L}^{-1} \times 0.025 \text{ L} = 1.39 \times 10^{-5} \text{ mol}$$

Charge used to produce free chlorine: (F is Faraday constant)

$$q_{\text{ClO}^-} = 2 \times n_{\text{ClO}^-} \times F = 2 \times 1.39 \times 10^{-5} \text{ mol} \times 96485 \text{ C} \cdot \text{mol}^{-1} = 2.68 \text{ C}$$

Faradaic yield:

$$\gamma = \frac{q_{\text{ClO}^-}}{q} \times 100\% = 50.7\%$$

**Electrocatalytic tests**

Pre-testing was carried out using  $\text{Ti}_2\text{O}_3$  electrode and MO+KCl electrolyte in order to find a time for comparison between different electrocatalytic tests. Over 90% of MO was degraded after 1.5h, so times of all tests were then fixed to 1.5h.

The light absorption at characteristic absorption peak of MO/TC in UV-vis spectra is proportional to the concentration of MO/TC. The degradation efficiency (percentage) is calculated by the ratio of concentration before and after the test.

$$\frac{C}{C_0} = \frac{A}{A_0}$$

where  $C_0$  is the concentration before the test,  $C$  is the concentration after the test,  $A_0$  is the absorbance before the test,  $A$  is the absorbance after the test.

**Table S1. Original UV-vis absorption data of MO degradation tests**

| Time (min) | UV-vis Absorption |         |                                   |
|------------|-------------------|---------|-----------------------------------|
|            | 400EC30-KCl       | FTO-KCl | 400EC30- $\text{Na}_2\text{SO}_4$ |
| 0          | 1.59              | 1.524   | 1.231                             |
| 30         | 0.547             | 0.989   | 1.152                             |
| 60         | 0.116             | 0.772   | 1.04                              |
| 90         | 0.034             | 0.566   | 0.952                             |

**Table S2. Original UV-vis absorption data of TC degradation tests**

| Time (min) | UV-vis Absorption |         |                                   |
|------------|-------------------|---------|-----------------------------------|
|            | 400EC30-KCl       | FTO-KCl | 400EC30- $\text{Na}_2\text{SO}_4$ |
| 0          | 0.423             | 0.432   | 0.438                             |
| 30         | 0.207             | 0.286   | 0.373                             |
| 60         | 0.132             | 0.218   | 0.363                             |

|    |       |       |      |
|----|-------|-------|------|
| 90 | 0.093 | 0.167 | 0.34 |
|----|-------|-------|------|
